# Supplementary material for: Fathering style influences health outcome in common marmoset (Callithrix jacchus) offspring
Source: PLoS One. 2017 Sep 28;12(9):e0185695. doi: 10.1371/journal.pone.0185695 (PMC5619809; doi:10.1371/journal.pone.0185695)
Supplement: S1 Dataset — (XLSX) [file pone.0185695.s001.xlsx]

## Sheet: Fig1 survival
	Died	Live
Responders	5	28
Non Responders	15	14
Table Analyzed	Fig 1A/survival
Fisher's exact test
P value	0.0028
P value summary	**
One- or two-sided	Two-sided
Statistically significant? (alpha<0.05)	Yes
Data analyzed	Died	Live	Total
Responders	5	28	33
Non Responders	15	14	29
Total	20	42	62

## Sheet: Fig2testosterone
	Responsive	Nonresponsive
percent change	277.45	116.92
	522.71	118.79
	346.66	97.41
	277.45	45.04

## Sheet: Fig3 survival
	Died	Live
Responders	75	153
Non Responders	76	86
Table Analyzed	Fig 3A/survialTotal
Fisher's exact test
P value	0.0061
P value summary	**
One- or two-sided	Two-sided
Statistically significant? (alpha<0.05)	Yes
Data analyzed	Died	Live	Total
Responders	75	153	228
Non Responders	76	86	162
Total	151	239	390

## Sheet: Fig1Weightdata
Days	Responsive Fathers																											NonresponsiveFathers
2	44.8	48.58	45	49.2	45.2	50.4	46.6	41.2	36.58	39.4	42	40.4	47.4	35.8	41.4	39.8	36.2	38.6	65.6568	38.2	31.8	44.8	39.2	27.8	35.2	35.2	28.8	43.74	44.24	32.8	35.4	39	38.8	35.2	30.8	51.06	39.4	38.4	35.8	37.6	33.6
4	61	62.16	59	67.4	63.4	65.8	66.2	59.4	50.16	54.8	56	55.8	62.8	52.6	56.8	56.6	54.4	58.2	82.2916	56.4	48.6	61.6	57.4	44.6	53.4	53.4	45.6	56.48	53.48	49.6	50.8	53	55.6	53.4	47.6	62.12	54.8	53.8	52.6	57.2	53.2
6	78	75.74	73	85.6	81.6	81.2	85.8	77.6	63.74	70.2	70	71.2	78.2	69.4	72.2	73.4	72.6	77.8	98.9264	74.6	65.4	78.4	75.6	61.4	71.6	71.6	62.4	69.22	62.72	66.4	66.2	67	72.4	71.6	64.4	73.18	70.2	69.2	69.4	76.8	72.8
8	95.2	89.32	87	103.8	99.8	96.6	105.4	95.8	77.32	85.6	84	86.6	93.6	86.2	87.6	90.2	90.8	97.4	115.561	92.8	82.2	95.2	93.8	78.2	89.8	89.8	79.2	81.96	71.96	83.2	81.6	81	89.2	89.8	81.2	84.24	85.6	84.6	86.2	96.4	92.4
10	112	102.9	101	122	118	112	125	114	90.9	101	98	102	109	103	103	107	109	117	132.196	111	99	112	112	95	108	108	96	94.7	81.2	100	97	95	106	108	98	95.3	101	100	103	116	112
12	128	116.48	115	140	136.2	127.4	144.6	132.2	104.48	116.4	112	117.4	124.4	119.8	118.4	123.8	127.2	136.6	148.831	129.2	115.8	128.8	130.2	111.8	126.2	126.2	112.8	107.44	90.44	116.8	112.4	109	122.8	126.2	114.8	106.36	116.4	115.4	119.8	135.6	131.6
14	145.6	130	129	158.4	154.4	142.8	164.2	150.4	118.06	131.8	126	132.8	139.8	136.6	133.8	140.6	145.4	156.2	165.466	147.4	132.6	145.6	148.4	128.6	144.4	144.4	129.6	120.18	99.68	133.6	127.8	123	139.6	144.4	131.6	117.42	131.8	130.8	136.6	155.2	151.2
16	162.4	143.64	143	176.6	172.6	158.2	138.8	168.6	131.64	147.2	140	148.2	155.2	153.4	149.2	157.4	163.6	175.8	182.1	165.6	149.4	162.4	166.6	145.4	162.6	162.6	146.4	132.92	108.92	150.4	143.2	137	156.4	162.6	148.4	128.48	147.2	146.2	153.4	174.8	170.8
18	179.2	157.22	157	194.8	190.8	173.6	203.4	186.8	145.22	162.6	154	163.6	170.6	170.2	164.6	174.2	181.8	195.4	198.735	183.8	166.2	179.2	184.8	162.2	180.8	180.8	163.2	145.66	118.16	167.2	158.6	151	173.2	180.8	165.2	139.54	162.6	161.6	170.2	194.4	190.4
20	196	170.8	171	213	209	189	223	205	158.8	178	168	179	186	187	180	191	200	215	215.37	202	183	196	203	179	199	199	180	158.4	127.4	184	174	165	190	199	182	150.6	178	177	187	214	210
22	212.8	184.38	185	231.2	227.2	204.4	242.6	223	172.38	193.4	182	194.4	201.4	203.8	195.4	207.8	218.2	234.6	232.005	220.2	199.8	212.8	221.2	195.8	217.2	217.2	196.8	171.14	136.64	200.8	189.4	179	206.8	217.2	198.8	161.66	193.4	192.4	203.8	233.6	229.6
24	229.6	197.96	199	249.4	245.4	219.8	262.2	241	185.96	208.8	196	209.8	216.8	220.6	210.8	224.6	236.4	254.2	248.64	238.4	216.6	229.6	239.4	212.6	235.4	235.4	213.6	183.88	145.88	217.6	204.8	193	223.6	235.4	215.6	172.72	208.8	207.8	220.6	253.2	249.2
26	246.4	211.54	213	267.6	263.6	235.2	281.8	259.6	199.54	224.2	210	225.2	232.2	237.4	226.2	241.4	254.6	273.8	265.274	256.6	233.4	246.4	257.6	229.4	253.6	253.6	230.4	196.62	155.12	234.4	220.2	207	240.4	253.6	232.4	183.78	224.2	223.2	237.4	272.8	268.8
28	263.2	225.12	227	285.8	281.8	250.6	301.4	277.8	213.12	239.6	224	240.6	247.6	254.2	241.6	258.2	272.8	293.4	281.909	274.8	250.2	263.2	275.8	246.2	271.8	271.8	247.2	209.36	164.36	251.2	235.6	221	257.2	271.8	249.2	194.84	239.6	238.6	254.2	292.4	288.4
30	280	238.7	241	304	300	266	321	296	226.7	255	238	256	263	271	257	275	291	313	298.544	293	267	280	294	263	290	290	264	222.1	173.6	268	251	235	274	290	266	205.9	255	254	271	312	308

## Sheet: Fig3Weightdata
Days	Responsive fathers														NonResponsive fathers
2	35	42.5526	36	34	41	33.7237	40	36.5	38.8346	41	36	34.5	40	40.4	45	30	46.35	26.19	33.59	39.4	32.07	37.8
4	45.782	50.5	50.5293	40	56	48.0821	46	48.368	53.45	50.7232	54.1656	53.5349	69.0452	55.8	51.26	36.95	61.56	38	47.76	56.71	44.61	53.12
6	63.1864	67	63.6546	63.9064	71.6	63.557	69.5712	63.257	65.5	65.5258	68.2088	69.7246	85.5928	71.2	76.45	44	76.12	56.08	63.83	73.61	58	69.4
8	80.266	83.868	83	83.5	81	82.2888	84.1426	81.6504	82.727	88.1578	80.5	85.9143	102.14	86.6	86.07	67.91	90.68	74.02	79.2	83.45	78.16	86.2
10	96.26	100.333	99.25	96	97.518	103.651	106.706	90	101	101.344	104.421	101.604	120	102	111.7	83.55	105.24	88.65	94.25	106.86	98	103
12	114	120.611	115.5	114	112.8	119.239	126.353	116.231	120.5	121.161	121.173	117.474	135.236	117.4	125	99.18	119.8	104.82	109.85	124.4	109.48	119.8
14	131.992	143	131.75	133.647	129.6	142.25	141.456	142.069	140.25	139	137.925	135.2	150	132.8	141.26	114.82	134.36	125	125.41	138.91	131.6	136.6
16	149.234	154.833	150.5	158.7	146.4	151.923	164.48	150.811	153.298	160.579	154.676	148.573	168.331	148.2	159.08	132	148.92	137.38	142.09	162	148.4	150.72
18	162.407	173	164.25	173.1	160.189	168.958	181.78	168.101	178	170.562	184	164.063	201	163.6	159.52	146.09	163.48	156	164.5	175.22	165.2	165.84
20	183.718	191	180.5	188.39	171.402	189	192.614	188.445	188.073	186.535	188.18	182.697	201.426	179	182	161.72	178.04	166.61	174.5	190	180	187
22	195.481	208	196.75	205.604	192	203.028	211	206.321	202	203	216	195.042	226	194.4	196	180	192.6	186	189.76	209.4	198.5	196.08
24	212.018	213.766	213	222.819	200	220.062	226.442	219.971	210.734	218.999	221.684	210.532	234.521	209.8	204	193	207.56	199	203.98	225.75	204	211.2
26	228.554	246.4	229.25	240.069	213	235.811	248.339	234.5	227.925	236.052	242	226.022	245	225.2	218.28	208.63	222.82	213.98	215.45	243.7	220.37	226.32
28	245.091	243.501	245.5	263.1	223.5	253.488	266.913	253.948	231.75	250.426	249	241.511	241	240.6	232.97	224.27	238.08	221	231.06	259.56	231.81	241.45
30	249	258.862	260.5	275.047	237	271.167	284.08	265.013	242.732	270.157	261.5	253.5	284.164	256	244	239	253.34	245.57	246.23	272	252.05	247
	All Infant Weight over the 30 weeks
	Group	2	4	6	8	10	12	14	16	18	20	22	24	26	28	30
	Responder	0.0154756	3.61092	4.0637	4.29453	4.48194	4.59512	4.77595	4.89583	5.00287	5.14166	5.1877	5.26871	5.34364	5.41335	5.46806
	Responder	3.43399	3.46574	3.98424	4.22447	4.41801	4.55388	4.71955	4.84191	4.95092	5.0814	5.13869	5.22082	5.29671	5.36725	5.42495
	Responder	3.49651	3.93876	4.15768	4.27667	4.4893	4.67283	4.82831	4.86753	4.90527	5.02322	5.1299	5.17635	5.19296	5.30911	5.37064
	Responder	3.55535	3.90041	4.14536	4.31749	4.50619	4.67283	4.82028	4.82831	5.00395	5.06994	5.15329	5.22897	5.2575	5.36615	5.45104
	Responder	3.34922	3.61092	4.05111	4.27599	4.45947	4.61445	4.7486	4.86687	5.04343	5.1299	5.15551	5.17615	5.31007	5.36129	5.44391
	Responder	3.30628	3.58352	4.00172	4.22532	4.40795	4.56232	4.69601	4.81392	4.99043	5.07517	5.10186	5.09987	5.25612	5.32301	5.38973
	Responder	3.55535	3.82389	4.14352	4.38535	4.47734	4.7362	4.88274	5.00552	5.11485	5.2134	5.30311	5.40268	5.46147	5.53215	5.59816
	Responder	3.4012	3.55535	4.14609	4.37856	4.56705	4.7185	4.8624	5.09375	5.09011	5.23111	5.27546	5.35667	5.43177	5.50163	5.51745
	Responder	3.65306	3.91202	4.28052	4.48999	4.66309	4.76217	4.93913	5.1358	5.15522	5.24795	5.35186	5.42935	5.48357	5.5512	5.57595
	Responder	3.76617	3.7612	4.29901	4.40672	4.68213	4.78119	4.99721	5.00836	5.17615	5.19336	5.34233	5.34941	5.41917	5.48437	5.45959
	Responder	3.66356	4.18526	4.38287	4.51086	4.80402	4.78749	4.92358	5.07517	5.13874	5.22843	5.2391	5.36598	5.42935	5.45959	5.48064
	Responder	3.31325	3.71357	4.12467	4.40672	4.56664	4.73098	4.87208	5.01728	5.10574	5.20484	5.295	5.36598	5.45409	5.52504	5.5913
	Responder	3.61092	4.07168	4.28509	4.35671	4.70048	4.67283	4.85534	5.01064	5.09681	5.20675	5.22305	5.32788	5.35186	5.3799	5.43154
	Responder	3.68888	4.23476	4.4496	4.62635	4.78749	4.90702	5.01064	5.12593	5.3033	5.30542	5.51141	5.45755	5.50126	5.4848	5.64955
	Responder	3.68888	4.25389	4.46697	4.64253	4.82831	4.9217	5.04986	5.13969	5.34233	5.31857	5.42053	5.47025	5.54126	5.52545	5.66179
	Responder	3.93183	4.02535	4.44289	4.63074	4.78882	5.01728	5.04536	5.15254	5.24933	5.33758	5.41867	5.52744	5.56344	5.58725	5.68988
	Responder	3.2973	3.55535	3.61092	4.18965	4.46591	4.68213	4.79579	4.83696	5.03695	5.11199	5.14458	5.20775	5.25227	5.35177	5.33754
	Responder	3.68888	4.05467	4.32192	4.53259	4.70652	4.85463	4.9836	5.09783	5.20033	5.2933	5.37836	5.45674	5.52942	5.59718	5.66064
	Responder	3.66356	4.04695	4.3234	4.53974	4.71751	4.86839	4.99946	5.11533	5.21915	5.31321	5.39917	5.47832	5.55167	5.62	5.68396
	Responder	3.52636	3.93041	4.21562	4.48864	4.55388	4.77205	4.91998	5.02242	5.12745	5.22249	5.30927	5.38907	5.46307	5.53192	5.59633
	Responder	3.49651	4.01042	4.25028	4.40672	4.62497	4.74485	4.99721	4.97604	5.07427	5.1637	5.24579	5.273	5.39215	5.45801	5.5198
	Responder	3.49651	3.93506	4.18038	4.37721	4.5416	4.68274	4.80641	4.91645	5.01557	5.17048	5.18846	5.26485	5.33582	5.40208	5.43372
	Responder	3.55535	3.99765	4.2492	4.45002	4.61718	4.76036	4.88558	4.99685	5.09697	5.24702	5.27138	5.34836	5.41984	5.48655	5.52146
	Responder	3.3485	3.71357	4.11372	4.35068	4.5421	4.62497	4.84105	4.99043	5.07089	5.23644	5.25765	5.3394	5.51343	5.43154	5.491
	Responder	3.30036	3.66356	4.13324	4.41884	4.53796	4.74057	4.88955	5.07517	5.16479	5.22456	5.31522	5.39833	5.43808	5.54633	5.61285
	Responder	3.484	3.71357	4.18103	4.43082	4.56435	4.7318	4.87612	5.09375	5.12694	5.1951	5.28223	5.36237	5.38907	5.50563	5.57023
	Responder	3.52636	3.61092	4.0526	4.3064	4.50864	4.59512	4.82069	4.94646	5.05817	5.14166	5.24993	5.33358	5.41077	5.50533	5.5493
	Responder	3.52636	3.61092	4.04234	4.31932	4.53598	4.59512	4.865	4.99619	5.11215	5.14166	5.31016	5.39617	5.47537	5.60212	5.61711
	Responder	3.64509	3.8712	4.17439	4.40719	4.57082	4.7114	4.92725	4.94432	5.04317	5.13311	5.21563	5.29186	5.36268	5.40717	5.49086
	Responder	3.65504	3.83945	4.06903	4.48858	4.66127	4.80848	5.09375	5.05047	5.23644	5.24516	5.32788	5.41165	5.48052	5.54809	5.54908
	Responder	3.57096	3.82864	4.16667	4.42383	4.59885	4.74775	4.91998	4.99203	5.14166	5.18819	5.28827	5.35659	5.42499	5.49291	5.52146
	Responder	3.66356	4.0702	4.24733	4.39776	4.52849	4.70953	4.70048	4.84158	5.07517	5.01064	5.10595	5.05625	5.20401	5.22036	5.35659
	Responder	3.71357	4.10826	4.28069	4.42772	4.55587	4.70953	4.85981	4.86399	5.01064	5.03044	5.0689	5.08451	5.21494	5.2933	5.36598
	Responder	3.66356	4.10843	4.16667	4.38826	4.61016	4.80402	4.95934	5.0876	5.21221	5.27043	5.33513	5.34457	5.43808	5.41832	5.42935
	Responder	3.73767	4.11155	4.18965	4.38203	4.62006	4.77912	4.90527	5.01396	5.17048	5.22843	5.25227	5.30007	5.37296	5.42715	5.3822
	Responder	3.46574	3.82501	4.15888	4.40875	4.60849	4.77491	4.85203	5.04235	5.15329	5.25314	5.34392	5.42715	5.52146	5.57531	5.6419
	Responder	3.3673	3.88156	4.20469	4.44852	4.64439	4.80811	4.96284	5.07204	5.18178	5.28066	5.37064	5.45318	5.52545	5.60027	5.66643
	Responder	3.86978	3.92197	4.35778	4.39445	4.70502	4.81471	5.01064	5.07517	5.19296	5.25227	5.33754	5.36488	5.43303	5.46383	5.49306
	Responder	3.75074	3.71357	4.19195	4.27667	4.43082	4.62056	4.84419	4.89035	5.0073	5.05625	5.11799	5.14952	5.21574	5.22575	5.26786
	Responder	3.85015	4.08035	4.2485	4.49857	4.59006	4.79257	4.96284	5.01728	5.15329	5.20431	5.28532	5.33754	5.42935	5.49512	5.5563
	Responder	3.7612	3.97714	4.18965	4.42924	4.51634	4.73946	4.86753	4.98361	5.11199	5.16696	5.25034	5.31321	5.40268	5.46547	5.528
	Responder	3.5166	3.82864	4.09434	4.41986	4.60072	4.75383	4.88658	5.12396	5.10862	5.20353	5.29021	5.36997	5.44384	5.51262	5.54518
	Responder	3.46457	3.78419	4.11087	4.4483	4.63784	4.79712	4.93448	5.18739	5.16295	5.26019	5.34881	5.43021	5.50549	5.57548	5.6058
	Responder	3.55535	3.92638	4.19759	4.41072	4.58497	4.73562	4.8655	4.98044	5.08352	5.17696	5.26269	5.34113	5.41411	5.48211	5.54579
	Responder	3.49651	3.88101	4.18244	4.41375	4.57471	4.75947	4.89587	5.01588	5.12302	5.21978	5.31321	5.38907	5.46405	5.5338	5.599
	Responder	3.61092	3.95023	4.24925	4.47913	4.61512	4.82325	4.95916	5.07878	5.18562	5.28213	5.3799	5.45104	5.52587	5.59549	5.66058
	Responder	3.73714	3.82864	4.346	4.5514	4.81624	4.8672	4.99418	5.10684	5.20809	5.37528	5.3842	5.46185	5.53389	5.55102	5.66407
	Responder	3.76633	3.80666	4.34774	4.54696	4.82028	4.85536	4.97996	5.09074	5.19046	5.36598	5.36426	5.44101	5.51228	5.52146	5.64119
	Responder	3.90264	4.00733	4.27667	4.48177	4.61852	4.7388	4.84615	5.07517	5.03145	5.11264	5.18773	5.25757	5.32285	5.38412	5.40268
	Responder	3.76285	3.93183	4.17439	4.42975	4.5801	4.71077	4.82631	5.0626	5.02373	5.10951	5.18852	5.26174	5.32996	5.39382	5.4161
	Responder	3.71357	4.07334	4.09434	4.50754	4.66975	4.80928	5.09987	5.04077	5.1391	5.22862	5.31078	5.3845	5.45726	5.52316	5.55296
	Responder	3.71357	3.98172	4.07754	4.51124	4.69818	4.85561	5.04986	5.11129	5.21818	5.31473	5.40278	5.48894	5.55856	5.6282	5.68358
	Responder	3.39867	4.02535	4.0787	4.39445	4.47975	4.63264	4.76522	4.59512	4.98704	5.08186	5.16847	5.24817	5.32199	5.39073	5.51343
	Responder	3.82864	4.02449	3.90197	4.42679	4.58004	4.7185	4.83014	4.93508	5.03004	5.11677	5.2575	5.27046	5.33927	5.40365	5.43372
	Responder	3.7612	4.08848	4.29716	4.46972	4.61684	4.74507	4.8587	4.99721	5.05331	5.13804	5.21615	5.2886	5.36129	5.41942	5.46383
	Responder	3.71357	4.07834	4.27335	4.43647	4.57667	4.69961	4.80908	4.98361	4.99753	5.07992	5.15603	5.22676	5.29282	5.35478	5.38907
	Responder	3.85015	4.09462	4.30977	4.20469	4.63703	4.81218	4.93447	5.0337	5.08056	5.21494	5.28489	5.33272	5.37296	5.40941	5.48687
	Responder	3.8712	4.14384	4.3428	4.29046	4.65089	4.79579	4.94164	5.0689	5.07636	5.20401	5.25402	5.29832	5.37296	5.40717	5.46806
	Responder	3.64223	3.89725	4.13517	4.38203	4.48864	4.7202	4.94876	4.95439	5.12396	5.14401	5.3033	5.30334	5.33754	5.44074	5.45104
	Responder	3.78419	4.14544	4.17439	4.62935	4.80482	5.01728	5.08388	5.19878	5.30182	5.50126	5.48065	5.55935	5.6323	5.70029	5.71043
	Responder	3.52636	3.98648	4.22257	4.38826	4.57364	4.71169	4.83297	4.94112	5.03871	5.12761	5.32788	5.28473	5.39816	5.37064	5.42274
	Responder	3.58352	3.99205	4.26152	4.3631	4.64843	4.79722	4.92671	5.04134	5.21494	5.2374	5.37528	5.40125	5.48894	5.51745	5.56643
	Responder	3.5024	3.80666	4.04305	4.20469	4.44311	4.58497	4.70918	4.81965	4.95583	5.05625	5.15329	5.17803	5.2403	5.22575	5.369
	Responder	3.3364	3.82864	4.21082	4.39445	4.67007	4.83908	4.9836	5.10986	5.22194	5.47227	5.41427	5.38907	5.5755	5.64731	5.71431
	Responder	3.07077	3.7612	4.16391	4.35671	4.67364	4.85568	5.00964	5.14302	5.26069	5.4848	5.46119	5.46383	5.62813	5.7022	5.77115
	Responder	3.69953	4.00733	4.24235	4.43251	4.59223	4.72991	4.85091	4.95884	5.05625	5.145	5.22651	5.30188	5.37196	5.43746	5.49892
	Responder	3.68888	4.06044	4.33073	4.54329	4.7185	4.86753	4.99721	5.11199	5.21494	5.30827	5.39363	5.47227	5.54518	5.61313	5.67675
	Responder	3.97989	3.78419	4.41674	4.57968	4.71976	4.8426	4.95199	5.3033	5.14032	5.22267	5.29874	5.36944	5.43547	5.4974	5.47227
	Responder	3.80043	3.82864	4.28043	4.4549	4.6034	4.73267	4.84713	4.94982	5.20401	5.12813	5.20662	5.2794	5.34724	5.41077	5.40717
	Responder	3.68888	3.88419	4.04305	4.15888	4.54002	4.77068	4.85203	4.97673	5.03552	5.12873	5.21398	5.29253	5.34233	5.43324	5.4968
	Responder	3.18264	3.68888	4.18965	4.37313	4.58175	4.7185	4.90527	5.02957	5.14319	5.2452	5.34233	5.42249	5.50059	5.57303	5.64057
	Responder	3.23636	3.68888	4.21951	4.39649	4.60257	4.75359	4.92725	5.04642	5.15928	5.26069	5.35186	5.43705	5.51479	5.58692	5.6542
	Responder	3.49651	3.92715	4.20754	4.42628	4.60565	4.75769	4.88964	5.02388	5.11056	5.20506	5.29139	5.37086	5.44448	5.51305	5.57215
	Responder	3.49651	3.91677	4.19433	4.41135	4.58957	4.74078	4.8721	5.00395	5.09214	5.18632	5.27239	5.35163	5.42505	5.49345	5.55296
	Responder	3.78419	3.99228	4.11087	4.46679	4.63982	4.78729	4.94164	5.02961	5.13181	5.22452	5.30827	5.38757	5.46009	5.52772	5.59105
	Responder	3.66356	3.91793	4.04305	4.37105	4.53841	4.68173	4.86753	4.91843	5.01862	5.10968	5.17615	5.27017	5.34168	5.40842	5.47098
	Responder	3.80666	4.11202	4.41316	4.64429	4.75359	4.98982	5.12616	5.2575	5.35323	5.44996	5.53816	5.6192	5.70044	5.76391	5.82909
	Responder	3.78419	4.12603	4.38791	4.59525	4.72739	4.91335	5.04107	5.18739	5.25602	5.34834	5.43284	5.51076	5.57595	5.65046	5.71361
	Responder	3.49651	3.88597	4.22161	4.40672	4.67283	4.83968	4.98263	5.10768	5.21881	5.32788	5.40973	5.49306	5.56998	5.6414	5.70806
	Responder	3.4012	3.82033	4.15142	4.35671	4.59848	4.76421	4.90633	5.03075	5.14139	5.24702	5.33157	5.41462	5.4913	5.56251	5.62899
	Responder	3.68888	3.97029	4.32319	4.54049	4.7189	4.87025	5.04343	5.11781	5.22185	5.3033	5.4022	5.48148	5.55493	5.6204	5.6874
	Responder	3.55535	3.89182	4.24811	4.45595	4.62794	4.77464	4.97673	5.01594	5.11777	5.23644	5.29478	5.37277	5.44511	5.48064	5.57577
	Responder	3.53943	3.82792	4.10512	4.41374	4.65396	4.74201	4.93806	4.98874	5.09987	5.18648	5.27239	5.3515	5.39816	5.49311	5.55704
	Responder	3.55597	3.89386	4.14867	4.47274	4.7185	4.8093	4.99721	5.06067	5.17048	5.26137	5.34839	5.42844	5.48064	5.57156	5.63611
	Responder	3.58352	3.92198	4.18965	4.49678	4.69447	4.85946	5.01064	5.12505	5.18739	5.33469	5.42505	5.53339	5.58443	5.65551	5.72187
	Responder	3.63759	4.02931	4.21951	4.53292	4.71343	4.86629	5.0626	5.11587	5.23644	5.31544	5.40204	5.45532	5.55554	5.62427	5.68858
	Responder	3.3673	3.87702	4.17603	4.40591	4.5326	4.75002	4.97673	5.00555	5.11239	5.2089	5.29691	5.3778	5.43372	5.52226	5.58735
	Responder	3.43399	3.8256	4.15283	4.39897	4.46591	4.7611	4.97673	5.02639	5.13659	5.23585	5.32614	5.40895	5.48064	5.55646	5.62278
	Responder	3.58352	3.88065	4.14155	4.30856	4.46014	4.66564	4.79312	4.90618	5.00774	5.09993	5.26269	5.26217	5.33438	5.40172	5.42935
	Responder	3.63759	3.81495	4.1224	4.21673	4.39136	4.70688	4.84449	4.96544	5.07332	5.24175	5.33272	5.34091	5.41626	5.48632	5.50126
	Responder	3.61092	3.99737	4.13517	4.48106	4.65648	4.80567	4.93547	5.11199	5.15336	5.24676	5.3845	5.41085	5.4838	5.55178	5.57215
	Responder	3.80666	4.06903	4.29046	4.62052	4.78567	4.98018	5.05146	5.26269	5.26124	5.3845	5.43455	5.54518	5.58221	5.56452	5.71085
	Responder	3.75579	3.73767	4.32643	4.52316	4.68748	4.83628	4.95219	5.18739	5.1613	5.37064	5.33415	5.41052	5.37528	5.52943	5.60947
	Responder	3.31301	3.85015	3.98898	4.20469	4.49761	4.65763	4.79554	4.91671	5.07517	5.14749	5.26269	5.26786	5.36817	5.39816	5.50386
	Responder	3.51973	3.82864	4.14313	4.4187	4.59908	4.75184	4.97673	5.0013	5.10601	5.20079	5.28735	5.36702	5.44081	5.48894	5.57381
	Responder	2.84357	3.52636	3.87763	4.15695	4.29046	4.55397	4.7057	4.83741	4.95377	5.12396	5.15237	5.23861	5.31799	5.36598	5.46004
	Responder	2.64347	3.49651	3.71011	3.99372	3.97029	4.3951	4.54808	4.68073	4.79783	5.01728	4.99751	5.08415	5.16387	5.1985	5.30647
	NonResponder	3.95678	3.82864	4.43379	4.59512	4.75542	4.88426	5.0814	5.23644	5.19371	5.27871	5.3799	5.42969	5.52545	5.56083	5.52545
	NonResponder	3.73767	3.98552	4.33666	4.41884	4.80178	4.97235	5.11801	5.24175	5.3579	5.4848	5.55124	5.63479	5.71318	5.78527	5.85251
	NonResponder	3.80666	3.80666	4.268	4.45515	4.61273	4.82831	4.8686	4.97555	5.07216	5.18739	5.24121	5.3161	5.38577	5.45091	5.48894
	NonResponder	3.52636	3.59991	3.59991	4.39445	4.56435	4.75359	4.82431	4.89784	4.91998	5.06681	5.1504	5.16859	5.21494	5.26269	5.30827
	NonResponder	3.61092	3.93684	4.19424	4.44265	4.49981	4.67749	4.79991	4.98361	5.01064	5.20401	5.27811	5.31812	5.37064	5.4161	5.49717
	NonResponder	3.4012	3.60114	3.68888	4.2182	4.42541	4.59696	4.74335	4.8828	4.98422	5.0859	5.19296	5.26267	5.34057	5.41284	5.47646
	NonResponder	3.3673	3.60964	3.78419	4.21183	4.41575	4.58504	4.72978	4.82831	4.96841	5.06929	5.18178	5.24486	5.33754	5.39415	5.45104
	NonResponder	3.69064	3.73767	4.34828	4.52179	4.74162	4.89228	5.09987	5.13892	5.2832	5.3845	5.49306	5.50159	5.57488	5.64317	5.61677
	NonResponder	3.67534	3.71357	4.34103	4.48864	4.73717	4.88864	5.12396	5.13637	5.27811	5.40717	5.46383	5.50022	5.57371	5.64216	5.61677
	NonResponder	3.57339	3.78419	4.21585	4.41884	4.60383	4.82831	4.88265	5.03044	5.10044	5.1938	5.28827	5.35784	5.39816	5.49873	5.56236
	NonResponder	3.66356	3.99277	4.17439	4.45817	4.6288	4.77452	4.90168	5.01447	5.17048	5.20785	5.29211	5.36982	5.44193	5.48894	5.5722
	NonResponder	3.63759	3.91778	4.09434	4.37089	4.53825	4.68157	4.80691	4.91827	5.04986	5.10952	5.19298	5.27	5.34152	5.39816	5.47082
	NonResponder	3.58352	3.89603	4.07754	4.40208	4.5832	4.73649	4.89784	4.98667	5.09163	5.18661	5.3033	5.32301	5.42707	5.49589	5.56028
	NonResponder	3.26555	3.78646	4.00733	4.40744	4.61195	4.78165	4.9267	5.12396	5.16573	5.26676	5.39363	5.44255	5.52007	5.592	5.62402
	NonResponder	3.51982	3.78495	3.98898	4.33602	4.50658	4.65224	4.77935	4.97673	4.99345	5.08545	5.22575	5.2933	5.31947	5.38672	5.36598
	NonResponder	3.02282	3.55535	3.99458	4.26521	4.47799	4.65333	4.79579	4.97673	5.04706	5.15006	5.24343	5.32883	5.39363	5.48043	5.5484
	NonResponder	3.16464	3.61092	4.10724	4.37359	4.58371	4.75726	4.90527	5.10595	5.14792	5.2503	5.34316	5.42812	5.48064	5.57905	5.64675
	NonResponder	3.1643	3.55535	4.02819	4.28224	4.48465	4.57471	4.90527	4.92272	5.05943	5.1358	5.22632	5.31	5.38721	5.45889	5.50533
	NonResponder	3.28461	3.63759	4.15256	4.40728	4.6101	4.74493	5.01728	5.04884	5.20126	5.23644	5.35275	5.4365	5.51378	5.58551	5.63479
	NonResponder	3.18989	3.46574	3.97212	4.26268	4.4056	4.56761	4.7362	4.82931	4.96981	5.03654	5.126	5.2081	5.28398	5.33272	5.42038
	NonResponder	3.19868	3.49651	4.0268	4.26268	4.47349	4.63911	4.82831	4.90552	5.0876	5.11568	5.20622	5.28925	5.36591	5.39816	5.50356
	NonResponder	2.92109	3.4012	3.71357	4.1204	4.32974	4.50276	4.63473	4.86753	4.89251	4.9947	5.15906	5.17225	5.25045	5.32297	5.33272
	NonResponder	3.01413	3.3322	3.80666	4.15542	4.35989	4.52956	4.75359	4.83628	4.91357	5.01459	5.16479	5.19036	5.26787	5.3398	5.35186
	NonResponder	3.29584	3.84587	4.04305	4.30439	4.47319	4.61757	4.82831	4.89035	4.95642	5.04791	5.15329	5.20906	5.28083	5.3478	5.37064
	NonResponder	3.29584	3.81049	3.95124	4.28531	4.45842	4.60594	4.82028	4.89035	4.95057	5.04331	5.16479	5.20639	5.27893	5.34657	5.36129
	NonResponder	3.66356	4.07374	4.33454	4.54119	4.71237	4.85849	5.02388	5.09899	5.20053	5.29271	5.36129	5.45493	5.52713	5.59447	5.65756
	NonResponder	3.55535	3.96731	4.25225	4.47374	4.65496	4.80832	4.94876	5.05859	5.16358	5.25859	5.34233	5.42518	5.4991	5.56794	5.63234
	NonResponder	3.68888	4.23036	4.40929	4.56102	4.62497	4.90527	4.95583	5.0626	5.14166	5.1985	5.24685	5.31074	5.37946	5.43971	5.42935
	NonResponder	3.78419	4.1954	4.36529	4.51047	4.63473	4.82831	4.8828	4.95934	5.0626	5.09375	5.17621	5.21494	5.30626	5.36545	5.40268
	NonResponder	3.43399	3.85306	4.13468	4.35417	4.49981	4.68645	4.81867	4.93543	5.07517	5.15906	5.22106	5.30063	5.34711	5.44297	5.5072
	NonResponder	3.46574	3.89051	4.15414	4.36257	4.5326	4.68196	4.81009	4.92365	5.05625	5.1358	5.20284	5.28092	5.32788	5.42086	5.48411
	NonResponder	3.41946	3.71357	4.13284	4.34381	4.54496	4.70101	4.83596	4.95484	5.14749	5.15711	5.24472	5.32527	5.39816	5.46918	5.50533
	NonResponder	3.51464	3.71357	4.15844	4.38203	4.54689	4.69613	4.82596	4.94086	5.14166	5.13731	5.22274	5.30144	5.36598	5.44239	5.47646
	NonResponder	2.99882	3.61092	4.00722	4.21951	4.58497	4.60517	4.82718	4.9581	5.07517	5.23644	5.27157	5.35747	5.40717	5.50987	5.57817
	NonResponder	3.41625	3.66356	4.13736	4.26268	4.67283	4.70953	4.84419	4.96349	5.15329	5.16479	5.25418	5.33492	5.36129	5.47913	5.54412
	NonResponder	3.58352	3.91701	4.17592	4.3814	4.52179	4.69729	4.82431	4.93699	5.0626	5.13019	5.21439	5.29205	5.35659	5.43132	5.4943
	NonResponder	3.55535	3.87898	4.17362	4.40091	4.51086	4.7421	4.8771	4.99603	5.1299	5.19836	5.28599	5.36656	5.43808	5.5105	5.57538
	NonResponder	3.11732	3.73767	4.02764	4.28909	4.49615	4.59512	4.81392	4.85203	5.0547	5.273	5.2486	5.36598	5.41094	5.43372	5.55057
	NonResponder	3.51385	3.66356	4.0985	4.29845	4.46501	4.66344	4.73263	4.84364	4.94355	5.10595	5.11763	5.20401	5.26585	5.27811	5.39492
	NonResponder	3.43399	3.86448	4.09434	4.42959	4.63473	4.80402	4.92888	5.07517	5.1616	5.24702	5.35659	5.43272	5.51745	5.57969	5.63479
	NonResponder	3.73767	4.14329	4.35556	4.41884	4.67945	4.83628	4.92371	5.09987	5.17048	5.20518	5.32788	5.35665	5.41165	5.48817	5.49306
	NonResponder	3.68888	4.05728	4.31517	4.41884	4.68992	4.86753	4.96188	5.10595	5.18178	5.26729	5.3799	5.42894	5.50939	5.56806	5.59842
	NonResponder	3.61092	3.79796	3.95124	4.31387	4.38203	4.65252	4.83628	4.94164	5.02388	5.09375	5.18178	5.273	5.37064	5.41755	5.46806
	NonResponder	3.4012	3.43399	4.06044	4.35405	4.61512	4.6957	4.90897	5.02388	5.05624	5.19296	5.24007	5.31321	5.39529	5.40042	5.52962
	NonResponder	3.46788	3.73767	4.00733	4.35879	4.4705	4.68905	4.86497	4.98018	5.1299	5.1358	5.29079	5.31812	5.37733	5.44591	5.42053
	NonResponder	3.63234	3.9725	4.07754	4.42782	4.59578	4.73953	4.96284	4.97682	5.07723	5.17615	5.25207	5.32922	5.40084	5.46768	5.50939
	NonResponder	3.07961	3.52636	3.99052	4.25206	4.41884	4.63067	4.77702	5.00395	5.01783	5.11949	5.21176	5.29623	5.34233	5.44637	5.51376
	NonResponder	3.66356	4.10872	4.36955	4.57623	4.80402	4.89355	5.02102	5.13406	5.23562	5.31321	5.4122	5.49002	5.56223	5.62957	5.69266
	NonResponder	3.80377	3.82864	4.31899	4.5024	4.65734	4.89784	4.90969	5.01541	5.11102	5.26269	5.27853	5.35282	5.42197	5.48665	5.50126
	NonResponder	3.73767	4.01096	4.07754	4.33073	4.51493	4.64303	4.75657	4.85853	5.0814	5.03572	5.11378	5.18619	5.19296	5.31695	5.37643
	NonResponder	3.80666	4.16456	4.37796	4.55373	4.70318	4.83316	4.94818	5.05133	5.1985	5.23031	5.30907	5.38207	5.45011	5.51381	5.55296
	NonResponder	3.64329	3.91202	4.34282	4.60517	4.7504	4.90516	5.0876	5.15728	5.26292	5.35846	5.44567	5.52587	5.60012	5.65599	5.73388
	NonResponder	3.80666	4.27988	4.51396	4.7035	4.78749	5.04343	5.12089	5.29832	5.32586	5.47646	5.49588	5.57115	5.64115	5.64897	5.76797
	NonResponder	3.7612	4.25869	4.49307	4.68281	4.81218	5.03044	5.10052	5.24702	5.3056	5.44674	5.4757	5.551	5.62103	5.63835	5.74789
